# Supplementary material for: Nutritional and Hydration Status and Adherence to Dietary Recommendations in Dalmatian Dialysis Patients
Source: MDPI journal article supplement (doi:10.3390/nu14173553), 2022-08-29
Supplement: s1 [file s1]

## Supplementary materials

Table S1. Lifestyle questionnaire and differences regarding dialysis modality.

| Table 1. Lifestyle questionnaire and differences regarding analysis mobility. |           |           |            |
|-------------------------------------------------------------------------------|-----------|-----------|------------|
|                                                                               | HD (N=55) | PD (N=20) | <i>p</i> * |
| LIFESTYLE QUESTIONNAIRE, N (%)                                                |           |           |            |
| Sex                                                                           |           |           |            |
| Male                                                                          | 38 (69)   | 11 (55)   | 0.26       |
| Female                                                                        | 17 (31)   | 9 (45)    |            |
| Education level                                                               |           |           |            |
| Elementary school                                                             | 11 (20)   | 4 (20)    | 0.19       |
| Middle school                                                                 | 34 (62)   | 10 (50)   |            |
| Intermediate education                                                        | 4 (7)     | 5 (25)    |            |
| Faculty education or higher                                                   | 6 (11)    | 1 (5)     |            |
| Working status                                                                |           |           |            |
| Employed full-time                                                            | 2 (4)     | 8 (40)    | <0.001     |
| Unemployed                                                                    | 4 (7)     | 2 (10)    |            |
| Student                                                                       | 0         | 1 (5)     |            |
| Retired                                                                       | 45 (82)   | 9 (45)    |            |
| Housewife                                                                     | 1 (1.8)   | 0         |            |
| Sick leave                                                                    | 3 (5.5)   | 0         |            |
| Inhabitant of                                                                 |           |           |            |
| Village                                                                       | 11 (20)   | 7 (35)    | 0.18       |
| Town/city                                                                     | 44 (80)   | 13 (65)   |            |
| Monthly household budget                                                      |           |           |            |
| < 2850 kn                                                                     | 8 (15)    | 1 (5)     | 0.42       |
| 2850 – 5700 kn                                                                | 15 (27)   | 3 (16)    |            |
| 5700 – 8600 kn                                                                | 12 (22)   | 7 (37)    |            |
| 8600 – 11400 kn                                                               | 11 (20)   | 3 (16)    |            |
| > 11400 kn                                                                    | 9 (16.4)  | 5 (26.3)  |            |
| Number of people in a household                                               |           |           |            |
| 1                                                                             | 10 (18)   | 2 (10)    | 0.11       |
| 2                                                                             | 21 (38)   | 8 (40)    |            |
| 3                                                                             | 14 (25)   | 1 (5)     |            |
| 4                                                                             | 4 (7)     | 4 (20)    |            |
| 5                                                                             | 3 (5.5)   | 3 (15)    |            |
| 6                                                                             | 2 (3.6)   | 2 (10)    |            |
| 9                                                                             | 1 (2)     | 0         |            |
| Physical activity intensity                                                   |           |           |            |
| Extremely weak                                                                | 1 (2)     | 3 (15)    | 0.10       |
| Weak                                                                          | 22 (40)   | 9 (45)    |            |
| Moderate                                                                      | 29 (53)   | 8 (40)    |            |
| Intense                                                                       | 3 (5)     | 0         |            |
| Liquid intake                                                                 |           |           |            |
| Does not consume liquid                                                       | 1 (2)     | 0         | 0.50       |
| 1 glass                                                                       | 14 (25)   | 3 (16)    |            |
| 2 glasses                                                                     | 14 (25)   | 5 (26)    |            |
| 3 glasses                                                                     | 15 (27)   | 3 (16)    |            |
| 4 glasses                                                                     | 7 (12.7)  | 5 (26.3)  |            |
| 5 glasses                                                                     | 4 (7.3)   | 3 (15.8)  |            |
| Loss of appetite, yes                                                         | 10 (18)   | 1 (5)     | 0.27       |

|                                          |         |         |        |
|------------------------------------------|---------|---------|--------|
| Regular stool                            | 41 (75) | 17 (85) | 0.53   |
| Nausea                                   | 15 (27) | 1 (5)   | 0.05   |
| Have chewing/swallowing problem          | 7 (13)  | 1 (5)   | 0.67   |
| Taking dietary supplements               | 28 (51) | 9 (45)  | 0.80   |
| Taking ONS                               | 24 (44) | 9 (45)  | > 0.99 |
| Taking ONS as prescribed by a specialist | 17 (71) | 5 (56)  | 0.44   |
| Number of meals                          |         |         |        |
| 1                                        | 1 (2)   | 0       | 0.64   |
| 2                                        | 7 (13)  | 1 (5)   |        |
| 3                                        | 19 (35) | 8 (40)  |        |
| 4                                        | 24 (44) | 9 (45)  |        |
| 5                                        | 4 (7.3) | 1 (5)   |        |
| 6                                        | 0       | 1 (5)   |        |

\**p*-values were obtained with Chi-square test. Abbreviations: HD- hemodialysis, PD- peritoneal dialysis, ONS- oral nutritional support.

Table S2. Nutrient adequacy ratios and differences regarding dialysis modality.

| NUTRIENT ADEQUACY |                      |                       |                      |        |
|-------------------|----------------------|-----------------------|----------------------|--------|
|                   | Median (IQR)         |                       |                      |        |
| NAR energy        | 0.55 (0.45-0.66)     | 0.88 (0.76-0.92)      | 0.64 (0.49-0.83)     | 0.07   |
| NAR protein       | 0.65 (0.46-0.81)     | 0.66 (0.46-0.8)       | 0.65 (0.47-0.81)     | 0.48   |
| NAR Na            | 0.82 (0.54 - 1.07)   | 0.87 (0.69 - 1.37)    | 0.84 (0.62 - 1.15)   | 0.18   |
| NAR K             | 0.59 (0.43 - 0.74)   | 0.8 (0.6 - 1.01)      | 0.63 (0.45 - 0.85)   | 0.01   |
| NAR Ca            | 0.78 (0.45 - 1.05)   | 0.88 (0.62 - 1.27)    | 0.79 (0.47 - 1.09)   | 0.17   |
| NAR P             | 0.8 (0.52 - 0.97)    | 1.18 (0.87 - 1.61)    | 0.86 (0.6 - 1.07)    | <0.001 |
| NAR Vitamin C     | 0.33 (0.14 - 0.63)   | 0.44 (0.2 - 0.71)     | 0.34 (0.15 - 0.67)   | 0.38   |
| NAR Vitamin D     | 0.14 (0.04 - 0.19)   | 0.12 (0.04 - 0.19)    | 0.13 (0.04 - 0.19)   | 0.96   |
| NAR Thiamin       | 12 (8.78 - 17)       | 13.5 (9 - 18.75)      | 12 (9 - 17)          | 0.47   |
| NAR Riboflavin    | 0.81 (0.5 - 1.06)    | 0.85 (0.56 - 1.38)    | 0.81 (0.5 - 1.13)    | 0.41   |
| NAR Niacin        | 12.81 (7.75 - 17.13) | 14.57 (10.13 - 20.86) | 13.38 (9.13 - 17.94) | 0.15   |
| NAR B6            | 0.69 (0.44 - 1.12)   | 0.88 (0.63 - 1.21)    | 0.77 (0.47 - 1.13)   | 0.17   |
| NAR Folic acid    | 0.39 (0.31 - 0.66)   | 0.5 (0.37 - 0.71)     | 0.45 (0.32 - 0.68)   | 0.16   |
| NAR B12           | 0.63 (0.38 - 1.08)   | 0.8 (0.39 - 1.21)     | 0.65 (0.38 - 1.13)   | 0.37   |
| MAR               | 0.68 (0.52 - 0.74)   | 0.79 (0.65 - 0.82)    | 0.69 (0.63 - 0.78)   | 0.20   |

*p*-values were obtained with the Mann-Whitney U test for non-parametric numerical data. Abbreviations: IQR- interquartile range, SFA- short-chain fatty acid, MUFA- monounsaturated fatty acid, PUFA- polyunsaturated fatty acid, NAR- nutrient adequacy ratio, MAR- mean adequacy ratio, Na- sodium, K- potassium, Ca- calcium, P- phosphate.

Table S3. Correlations of Malnutrition Inflammation Score and measured parameters.

|                                     | HD (N=55)            | PD (N=20)            |
|-------------------------------------|----------------------|----------------------|
| Parameters                          | R ( <i>p</i> -value) | R ( <i>p</i> -value) |
| Middle upper arm circumference (cm) | -0.331 (0.02)        | -0.266 (0.26)        |
| Waist circumference (cm)            | -0.317 (0.02)        | -0.358 (0.12)        |
| Hip circumference (cm)              | -0.297 (0.03)        | -0.318 (0.17)        |
| Weight (kg)                         | -0.387 (<0.001)      | -0.355 (0.12)        |
| BMI (kg/m <sup>2</sup> )            | -0.290 (0.03)        | -0.333 (0.15)        |
| TBW (kg)                            | -0.193 (0.16)        | -0.264 (0.26)        |
| ECW (kg)                            | -0.245 (0.07)        | -0.33 (0.16)         |
| ICW (kg)                            | -0.144 (0.29)        | -0.224 (0.34)        |
| Fat mass (%)                        | -0.282 (0.04)        | -0.173 (0.47)        |
| Fat mass (kg)                       | -0.368 (0.01)        | -0.273 (0.24)        |
| Visceral fat                        | -0.386 (<0.001)      | -0.202 (0.39)        |
| Fat-free mass (kg)                  | -0.213 (0.12)        | -0.412 (0.07)        |
| Muscle mass (%)                     | -0.213 (0.12)        | -0.412 (0.07)        |
| Trunk fat (%)                       | -0.378 (0.01)        | -0.265 (0.26)        |
| Trunk fat (kg)                      | -0.415 (<0.001)      | -0.389 (0.09)        |
| TIBC (μmol/L)                       | -0.288 (0.04)        | 0.217 (0.52)         |
| Uric acid (mmol/L)                  | -0.332 (0.02)        | -0.655 (0.2)         |
| Triglycerides (mmol/L)              | -0.32 (0.02)         | -0.18 (0.47)         |

*p*-values were obtained with the Spearman's coefficient of rank correlation Rho. Abbreviations: N- number, BMI- Body mass index, TBW-Total body water (kg), ECW-Extracellular water (kg), ICW-Intracellular water (kg), TIBC- total iron-binding capacity.
